# Supplementary material
Source: PubMed Central journal article supplement (PMC4215048)
Supplement: amiajnl-2013-002627-s1.pdf [file amiajnl-2013-002627-s1.pdf]

APPENDIX: Metrics from Table 2 limited to providers (n=46) with data in all study years

| Metric                                         | Median per provider (25th percentile, 75th percentile) |                  |                  |                  |                  | P for trend        |
|------------------------------------------------|--------------------------------------------------------|------------------|------------------|------------------|------------------|--------------------|
|                                                | All Years <sup>a</sup>                                 | 2010             | 2011             | 2012             | 2013             |                    |
| <b>Data access</b>                             |                                                        |                  |                  |                  |                  |                    |
| % of encounters per provider with:             |                                                        |                  |                  |                  |                  |                    |
| Problem list marked as reviewed                | 8.8 (4.1-12.0)                                         | 5.0 (1.9-19.9)   | 8.0 (3.3-12.8)   | 7.8 (3.6-10.2)   | 6.2 (3.1-10.3)   | .02                |
| Medication list marked as reviewed             | 4.1 (2.3-9.4)                                          | 2.1 (0.1-10.1)   | 3.5 (1.1-11.1)   | 4.6 (2.1-9.5)    | 8.1 (3.3-10.6)   | .75                |
| Allergies marked as reviewed                   | 80.4 (74.0-83.7)                                       | 79.1 (73.8-82.8) | 82.3 (75.3-87.2) | 81.2 (75.3-85.8) | 80.3 (74.6-85.7) | .16                |
| Problem list altered                           | 21.7 (16.2-28.7)                                       | 19.6 (14.8-23.8) | 21.4 (16.3-26.0) | 22.2 (16.0-29.9) | 23.1 (15.7-30.7) | .004               |
| ≥ 1 problem added                              | 21.7 (16.2-28.7)                                       | 19.6 (14.8-23.8) | 21.4 (16.3-26.0) | 22.2 (16.0-29.7) | 23.1 (15.7-30.7) | .004               |
| ≥ 1 problem replaced                           | 0.0 (0.0-0.0)                                          | 0.0 (0.0-0.0)    | 0.0 (0.0-0.0)    | 0.0 (0.0-0.0)    | 0.0 (0.0-0.0)    | .049               |
| ≥ 1 problem dropped                            | 0.0 (0.0-0.0)                                          | 0.0 (0.0-0.0)    | 0.0 (0.0-0.0)    | 0.0 (0.0-0.0)    | 0.0 (0.0-0.0)    | .06                |
| Days to review laboratory results              | 4.8 (3.3-8.6)                                          | 4.8 (3.0-8.1)    | 5.3 (3.0-9.5)    | 4.2 (3.0-7.8)    | 4.0 (2.5-6.5)    | .03                |
| <b>Clinical decision support measures</b>      |                                                        |                  |                  |                  |                  |                    |
| % best practice alerts 'accepted'              | 21.2 (14.8-30.1)                                       | 19 (13-27)       | 20 (14-31)       | 24 (17-30)       | 23 (16-28)       | .01                |
| % prescribing alerts 'accepted'                | 0.1 (0.0-0.2)                                          | 0.1 (0.0-0.3)    | 0.0 (0.0-0.2)    | 0.0 (0.0-0.1)    | 0.0 (0.0-0.1)    | .03                |
| Drug-allergy alerts                            | 0.0 (0.0-0.3)                                          | 0.0 (0.0-0.0)    | 0.0 (0.0-0.0)    | 0.0 (0.0-0.0)    | 0.0 (0.0-0.0)    | NT                 |
| Drug-disease alerts                            | 0.0 (0.0-0.0)                                          | 0.0 (0.0-0.0)    | 0.0 (0.0-0.0)    | 0.0 (0.0-0.0)    | 0.0 (0.0-0.0)    | NT                 |
| Drug-drug interaction alerts                   | 0.1 (0.0-0.3)                                          | 0.1 (0.0-0.4)    | 0.0 (0.0-0.3)    | 0.0 (0.0-0.1)    | 0.0 (0.0-0.1)    | NT                 |
| Drug-food alerts                               | 0.0 (0.0-0.0)                                          | 0.0 (0.0-0.0)    | 0.0 (0.0-0.0)    | 0.0 (0.0-0.0)    | 0.0 (0.0-0.0)    | NT                 |
| <b>Ordering</b>                                |                                                        |                  |                  |                  |                  |                    |
| Labs ordered per encounter                     | 0.9 (0.6-1.4)                                          | 0.7 (0.4-1.0)    | 0.8 (0.5-1.2)    | 1.2 (0.8-1.6)    | 1.2 (0.8-1.6)    | <.001              |
| Number of order set uses per encounter         | 1.1 (0.9-1.4)                                          | 1.0 (0.9-1.4)    | 1.2 (0.9-1.6)    | 1.1 (0.9-1.5)    | 1.1 (0.9-1.3)    | .49                |
| <b>Care coordination measures</b>              |                                                        |                  |                  |                  |                  |                    |
| % encounters with after-visit summary printed  | 54.4 (27.9-70.5)                                       | 12.4 (3.4-38.2)  | 50.3 (21.2-71.9) | 65.2 (39.4-91.5) | 92.7 (67.1-96.6) | <.001              |
| Patients messaged/month                        | 2 (1-5)                                                | 1 (0-3)          | 2 (1-5)          | 3 (1-6)          | 2 (1-5)          | .40                |
| Provider-initiated messages/month              | 3 (1-6)                                                | 2 (0-4)          | 2 (1-5)          | 3 (1-6)          | 2 (1-6)          | .48                |
| % patient-initiated messages responded to      | 99 (98-100)                                            | 100 (100-100)    | 100 (99-100)     | 100 (98-100)     | 100 (94-100)     | .27                |
| % of patient panel using portal during year    | 8.3 (5.3-19.9)                                         | 11.2 (6.4-26.1)  | 11.3 (5.9-22.9)  | 8.6 (5.3-15.6)   | 8.1 (4.9-15.4)   | <.001 <sup>b</sup> |
| % of portal users using portal ≥ 15 times/year | 57.3 (52.0-63.5)                                       | 55.3 (51.2-65.6) | 59.1 (53.2-65.7) | 63.7 (56.7-71.1) | 54.9 (43.7-60.0) | <.001 <sup>b</sup> |
| <b>Population/panel level</b>                  |                                                        |                  |                  |                  |                  |                    |
| Viewed panel-level reports                     | 2.9 (0.0-9.4)                                          | NA               | 1 (0-8)          | 3 (0-9)          | 0 (0-4)          | .16                |
| <b>MU objective measures<sup>c</sup></b>       |                                                        |                  |                  |                  |                  |                    |
| <b>Core</b>                                    |                                                        |                  |                  |                  |                  |                    |
| Core 1 – CPOE                                  | 100 (99-100)                                           | NA               | 100 (99-100)     | 100 (99-100)     | 100 (99-100)     | .01                |
| Core 3 – Problem list                          | 97 (96-98)                                             | NA               | 96 (95-98)       | 97 (96-98)       | 98 (97-99)       | <.001              |
| Core 4 – E-prescribing                         | 74 (56-87)                                             | NA               | 72 (53-87)       | 76 (55-89)       | 77 (59-88)       | <.001              |
| Core 5 – Medication list                       | 95 (93-97)                                             | NA               | 95 (93-97)       | 95 (93-97)       | 96 (95-98)       | <.001              |
| Core 6 – Allergy list                          | 99 (99-100)                                            | NA               | 99 (99-100)      | 99 (99-100)      | 99 (99-100)      | .02                |

|                                              |               |    |                 |                 |               |       |
|----------------------------------------------|---------------|----|-----------------|-----------------|---------------|-------|
| Core 7 – Demographics recorded               | 94 (90-96)    | NA | 94 (90-96)      | 93 (91-95)      | 95 (91-96)    | .12   |
| Core 8 – Vitals recorded                     | 97 (97-98)    | NA | 97 (96-98)      | 97 (97-98)      | 98 (97-98)    | <.001 |
| Core 9 – Smoking status recorded             | 98 (97-99)    | NA | 98 (96-99)      | 98 (98-99)      | 99 (98-99)    | <.001 |
| Core 11 – Patient copy of health information | 100 (100-100) | NA | -- <sup>d</sup> | -- <sup>d</sup> | 100 (100-100) | NT    |
| Core 12 – After-visit summary                | 55 (32-74)    | NA | 43 (27-62)      | 56 (35-79)      | 65 (46-80)    | <.001 |
| <b>Menu</b>                                  |               |    |                 |                 |               |       |
| Menu 7 – Timely access to data for patients  | 79 (76-86)    | NA | 73 (70-79)      | 81 (77-88)      | 86 (83-91)    | <.001 |
| Menu 8 – Patient education                   | 65 (56-72)    | NA | 56 (46-67)      | 70 (60-79)      | 74 (68-82)    | <.001 |
| Menu 9 – Medication reconciliation           | 10 (7-20)     | NA | 9 (3-19)        | 12 (7-22)       | 18 (10-27)    | <.001 |
| Menu 10 – Summary of care at transitions     | 66 (32-88)    | NA | 52 (21-78)      | 76 (41-95)      | 82 (53-96)    | <.001 |

a. For panel-level reports and MU measures, this column contains weighted averages. For remaining metrics, pooled results are reported.

b. Comparisons do not include 2013 data as half-year results would not be expected to be similar to full-year results.

c. Percent of patients for whom metric was met, except for e-prescribing metric, which is calculated as percent of prescriptions. Core 2, 10, 13 were accomplished at the organizational level and are not included as they do not vary by provider.

d. No provider had data for this measure in 2011 or 2012.
